# Supplementary material for: “What Do We Know about Hope in Nursing Care?”: A Synthesis of Concept Analysis Studies
Source: MDPI journal article supplement (doi:10.3390/healthcare11202739), 2023-10-14
Supplement: s1 [file s1]

## Search Protocol

Search engine: PubMed

| <i>Search</i> | <i>Search Equation</i> | <i>Results</i> |
|---------------|------------------------|----------------|
| #1            | hope                   | 719            |
| #2            | concept                | 2,525          |
| #3            | analysis               | 101,044        |
| #4            | nur*                   | 423            |
| #5            | 1 AND 2 AND 3 AND 4    | 204            |

Search engine: Cinahl

| <i>Search</i> | <i>Search Equation</i> | <i>Results</i> |
|---------------|------------------------|----------------|
| #1            |                        | 9,269          |
| #2            |                        | 21,752         |
| #3            |                        | 271,192        |
| #4            |                        | 393,752        |
| #5            |                        | 27             |

Search engine: Medline

| <i>Search</i> | <i>Search Equation</i> | <i>Results</i> |
|---------------|------------------------|----------------|
| #1            |                        | 12,737         |
| #2            |                        | 81,510         |
| #3            |                        | 1,230,848      |
| #4            |                        | 296,659        |
| #5            |                        | 39             |

Search engine: Scopus

| <i>Search</i> | <i>Search Equation</i> | <i>Results</i> |
|---------------|------------------------|----------------|
| #1            |                        | 126,064        |

|    |  |        |
|----|--|--------|
| #2 |  | 55,468 |
| #3 |  | 1,829  |
| #4 |  | 1,540  |
| #5 |  | 50     |
